# Supplementary material for: Unveiling the mechanism of CO2 electroreduction to C1 and C2 products of ordered double transition metal MXenes
Source: Royal Society of Chemistry journal article supplement (doi:10.1039/d4se00582a), 2024-01-01
Supplement: d4se00582a1.pdf [file d4se00582a1.pdf]

## Supporting information

### Unveiling the mechanism of CO<sub>2</sub> electroreduction to C<sub>1</sub> and C<sub>2</sub> products on ordered double transition metal MXenes.

Romana Khanam<sup>a</sup>, Syed Fozia<sup>a</sup> and Manzoor Ahmad Dar<sup>a\*</sup>

<sup>a</sup> Department of Chemistry, Islamic University of Science and Technology,

Awantipora, Jammu and Kashmir-192122, India

## Table of Contents

**Table S1:** Optimized geometries of Unit cells of M-Xenes along with calculated lattice parameters.

**Fig. S1:** Top view of optimised structures of M'<sub>2</sub>M''C M-Xenes where M' can be Cr, Mo, Ti, V and M'' be Nb, Ta, Ti, and V.

**Fig. S2:** Top view of lowest energy configuration of CO<sub>2</sub> adsorbed on M-Xenes.

**Table S2:** Calculated Bader charge of CO<sub>2</sub> adsorbed on MXenes.

**Table S3:** Calculated activation barrier of C-O dissociation mechanism for three best catalysts.

**Fig. S3:** Phase plot comparing CO<sub>2</sub> binding energy with a) binding energy of \*OH b) binding energy of \*H c) binding energy of \*O

**Fig. S4:** Behaviour of CO<sub>2</sub> adsorption on the catalyst surface with other co-adsorbates (\*H, \*O, \*OH).

**Fig. S5:** Detailed computed free energy diagram representing the various possible pathways for the reduction of CO<sub>2</sub> to C<sub>1</sub> products on **a)** Cr<sub>2</sub>NbC<sub>2</sub> **b)** Cr<sub>2</sub>TaC<sub>2</sub> **c)** Cr<sub>2</sub>TiC<sub>2</sub> **d)** Cr<sub>2</sub>VC<sub>2</sub> **e)** Mo<sub>2</sub>NbC<sub>2</sub> **f)** Mo<sub>2</sub>TaC<sub>2</sub> **g)** Mo<sub>2</sub>TiC<sub>2</sub> **h)** Mo<sub>2</sub>VC<sub>2</sub> **i)** Ti<sub>2</sub>NbC<sub>2</sub> **j)** Ti<sub>2</sub>TaC<sub>2</sub> **k)** V<sub>2</sub>TaC<sub>2</sub> **l)** V<sub>2</sub>TiC<sub>2</sub>

**Fig. S6:** Detailed computed free energy diagram representing the various possible pathways for the reduction of CO<sub>2</sub> to C<sub>2</sub> products on **a)** Cr<sub>2</sub>NbC<sub>2</sub> **b)** Cr<sub>2</sub>TaC<sub>2</sub> **c)** Cr<sub>2</sub>TiC<sub>2</sub> **d)** Cr<sub>2</sub>VC<sub>2</sub> **e)** Mo<sub>2</sub>NbC<sub>2</sub> **f)** Mo<sub>2</sub>TaC<sub>2</sub> **g)** Mo<sub>2</sub>TiC<sub>2</sub> **h)** Mo<sub>2</sub>VC<sub>2</sub> **i)** Ti<sub>2</sub>NbC<sub>2</sub> **j)** Ti<sub>2</sub>TaC<sub>2</sub> **k)** V<sub>2</sub>TaC<sub>2</sub> **l)** V<sub>2</sub>TiC<sub>2</sub>

**Fig. S7:** Proposed reaction mechanism for CO<sub>2</sub> reduction to **a)** C<sub>1</sub> products (CH<sub>4</sub> and CH<sub>3</sub>OH) and **b)** C<sub>2</sub> products (C<sub>2</sub>H<sub>4</sub> and C<sub>2</sub>H<sub>5</sub>OH) on MXenes.

**Fig S8:** Electrode/Solution Interface of potential determining steps of CO<sub>2</sub> reduction on Mo<sub>2</sub>TaC<sub>2</sub> MXene: **a)** Initial state and **b)** Final state of C<sub>2</sub> products.

**Fig. S9:** Variation of energy versus the AIMD simulation time for  $\text{Mo}_2\text{TaC}_2$  for 6 ps at 600 K. The insets are the top views of snapshots of configurations.

**Table S1:** *Optimized geometries of Unit cells of M-Xenes along with calculated lattice parameters.*

| System                    | Structure                                                                           | Lattice parameters                                                                          |
|---------------------------|-------------------------------------------------------------------------------------|---------------------------------------------------------------------------------------------|
| $\text{Cr}_2\text{NbC}_2$ | 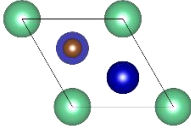   | $a=b=3.175 \text{ \AA}$ $c=5.874 \text{ \AA}$<br>$\alpha=\beta=90^\circ$ $\gamma=120^\circ$ |
| $\text{Cr}_2\text{TaC}_2$ |    | $a=b=3.164 \text{ \AA}$ $c=5.816 \text{ \AA}$<br>$\alpha=\beta=90^\circ$ $\gamma=120^\circ$ |
| $\text{Cr}_2\text{TiC}_2$ |    | $a=b=3.035 \text{ \AA}$ $c=6.242 \text{ \AA}$<br>$\alpha=\beta=90^\circ$ $\gamma=120^\circ$ |
| $\text{Cr}_2\text{VC}_2$  |    | $a=b=3.006 \text{ \AA}$ $c=6.172 \text{ \AA}$<br>$\alpha=\beta=90^\circ$ $\gamma=120^\circ$ |
| $\text{Mo}_2\text{NbC}_2$ |  | $a=b=3.282 \text{ \AA}$ $c=6.584 \text{ \AA}$<br>$\alpha=\beta=90^\circ$ $\gamma=120^\circ$ |
| $\text{Mo}_2\text{TaC}_2$ |  | $a=b=3.134 \text{ \AA}$ $c=7.050 \text{ \AA}$<br>$\alpha=\beta=90^\circ$ $\gamma=120^\circ$ |
| $\text{Mo}_2\text{TiC}_2$ |  | $a=b=3.167 \text{ \AA}$ $c=6.712 \text{ \AA}$<br>$\alpha=\beta=90^\circ$ $\gamma=120^\circ$ |
| $\text{Mo}_2\text{VC}_2$  |  | $a=b=3.188 \text{ \AA}$ $c=6.438 \text{ \AA}$<br>$\alpha=\beta=90^\circ$ $\gamma=120^\circ$ |
| $\text{Ti}_2\text{NbC}_2$ |  | $a=b=3.157 \text{ \AA}$ $c=7.143 \text{ \AA}$<br>$\alpha=\beta=90^\circ$ $\gamma=120^\circ$ |

|                                      |                                                                                   |                                                                                             |
|--------------------------------------|-----------------------------------------------------------------------------------|---------------------------------------------------------------------------------------------|
| <b>Ti<sub>2</sub>TaC<sub>2</sub></b> | 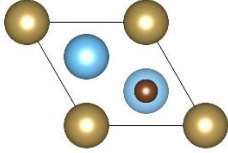 | $a=b=3.089 \text{ \AA}$ $c=7.480 \text{ \AA}$<br>$\alpha=\beta=90^\circ$ $\gamma=120^\circ$ |
| <b>V<sub>2</sub>TaC<sub>2</sub></b>  |  | $a=b=3.091 \text{ \AA}$ $c=6.681 \text{ \AA}$<br>$\alpha=\beta=90^\circ$ $\gamma=120^\circ$ |
| <b>V<sub>2</sub>TiC<sub>2</sub></b>  |  | $a=b=3.005 \text{ \AA}$ $c=6.816 \text{ \AA}$<br>$\alpha=\beta=90^\circ$ $\gamma=120^\circ$ |

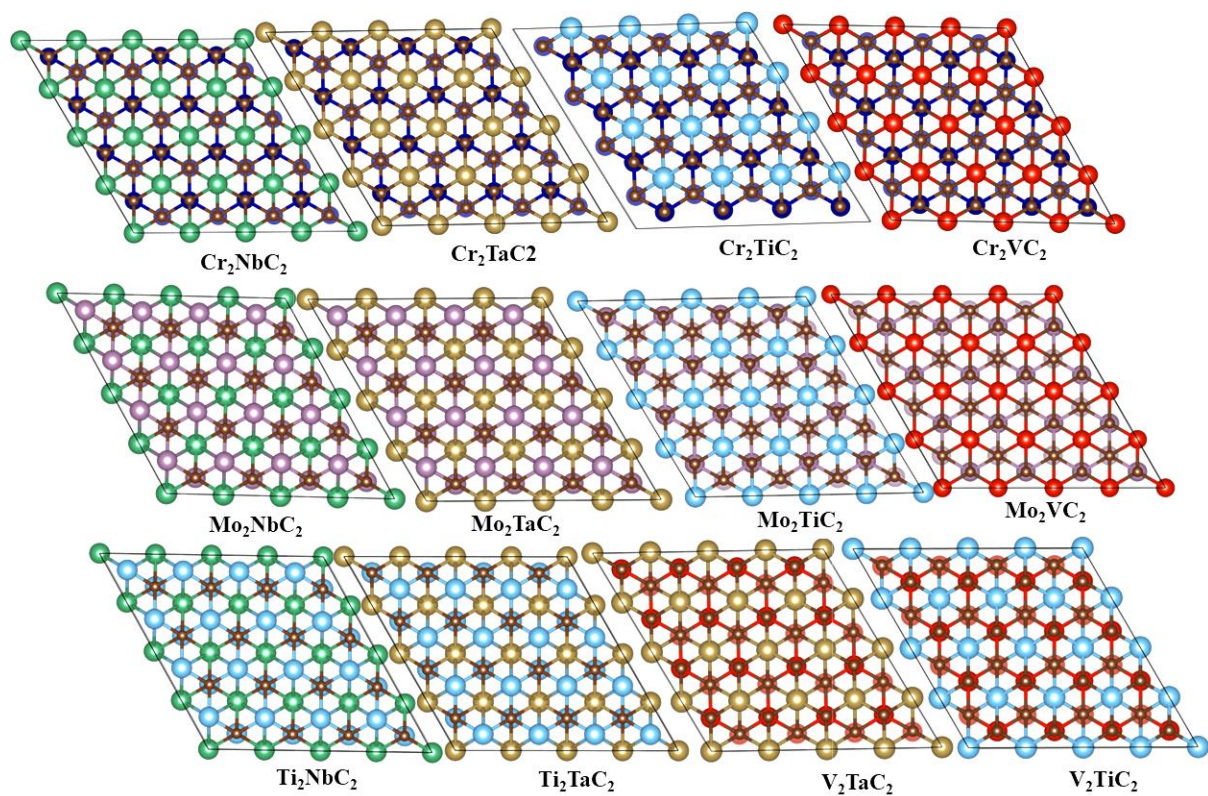

**Fig S1:** Top view of optimised structures of  $M'_2M''C$  MXenes where  $M'$  can be Cr, Mo, Ti, V and  $M''$  be Nb, Ta, Ti, and V.

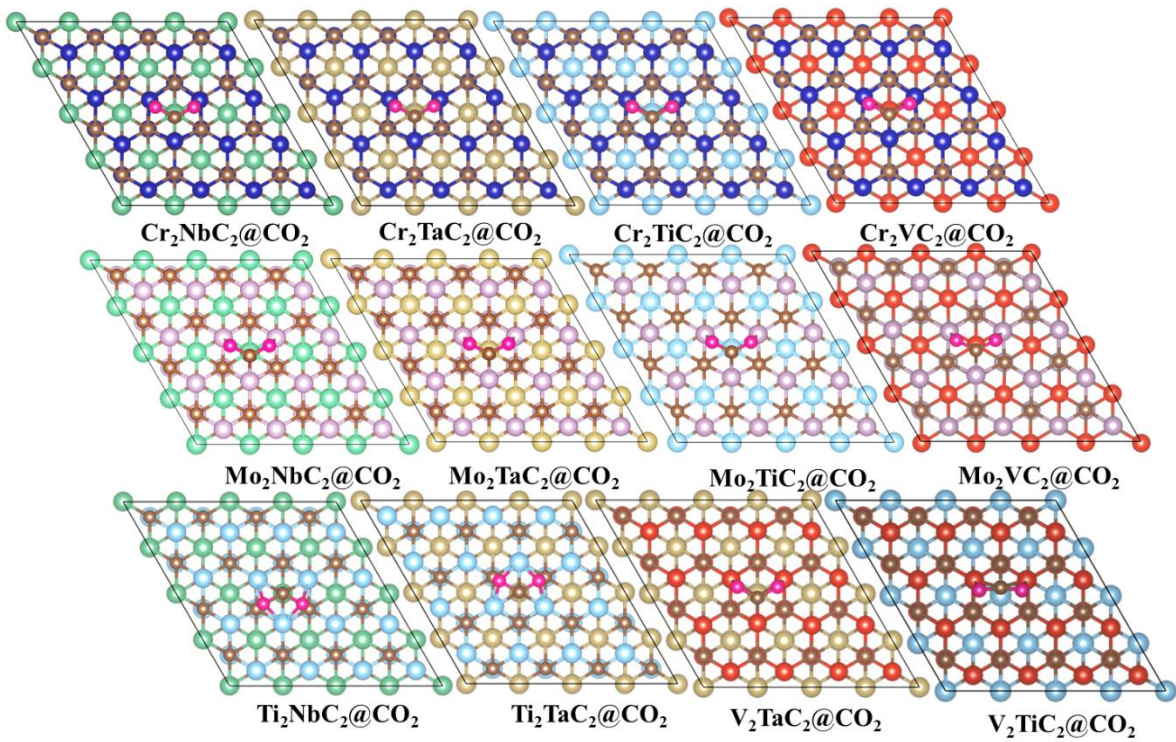

**Fig. S2:** Top view of lowest energy configuration of  $\text{CO}_2$  adsorbed on MXenes.

**Table S2:** Calculated Bader charge of CO<sub>2</sub> adsorbed on MXenes.

| Catalyst                         | C (e) | O (e) | Net Bader charge (e) |
|----------------------------------|-------|-------|----------------------|
| Cr <sub>2</sub> NbC <sub>2</sub> | 0.86  | -1.06 | -1.26                |
| Cr <sub>2</sub> TaC <sub>2</sub> | 0.87  | -1.06 | -1.25                |
| Cr <sub>2</sub> TiC <sub>2</sub> | 0.82  | -1.05 | -1.28                |
| Cr <sub>2</sub> VC <sub>2</sub>  | 0.82  | -1.05 | -1.28                |
| Mo <sub>2</sub> NbC <sub>2</sub> | 0.87  | -1.05 | -1.23                |
| Mo <sub>2</sub> TaC <sub>2</sub> | 0.87  | -1.05 | -1.23                |
| Mo <sub>2</sub> TiC <sub>2</sub> | 0.88  | -1.05 | -1.22                |
| Mo <sub>2</sub> VC <sub>2</sub>  | 0.86  | -1.06 | -1.26                |
| Ti <sub>2</sub> NbC <sub>2</sub> | 0.67  | -1.13 | -1.59                |
| Ti <sub>2</sub> TaC <sub>2</sub> | 0.59  | -1.12 | -1.65                |
| V <sub>2</sub> TaC <sub>2</sub>  | 0.71  | -1.06 | -1.41                |
| V <sub>2</sub> TiC <sub>2</sub>  | 1.07  | -1.12 | -1.17                |

**Table S3:** Calculated activation barrier of C-O dissociation mechanism for three best catalysts.

| Catalyst                         | $\Delta G_{CO}$ (eV) | $\Delta G_{CO_2}$ (eV) | $\Delta G_a$ (eV) |
|----------------------------------|----------------------|------------------------|-------------------|
| Mo <sub>2</sub> TaC <sub>2</sub> | -1.38                | -1.9                   | 0.51              |
| Mo <sub>2</sub> TiC <sub>2</sub> | -1.66                | -2.18                  | 0.52              |
| Mo <sub>2</sub> VC <sub>2</sub>  | -1.82                | -2.45                  | 0.63              |

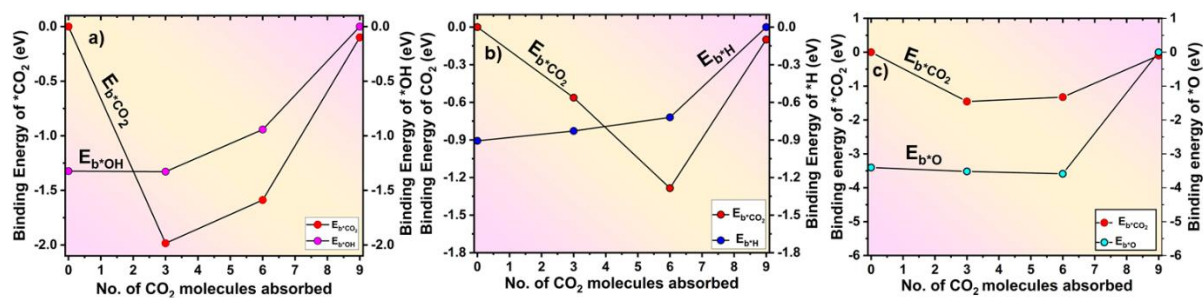

**Fig. S3:** Phase plot comparing  $\text{CO}_2$  binding energy with a) binding energy of  $\text{*OH}$  b) binding energy of  $\text{*H}$  c) binding energy of  $\text{*O}$

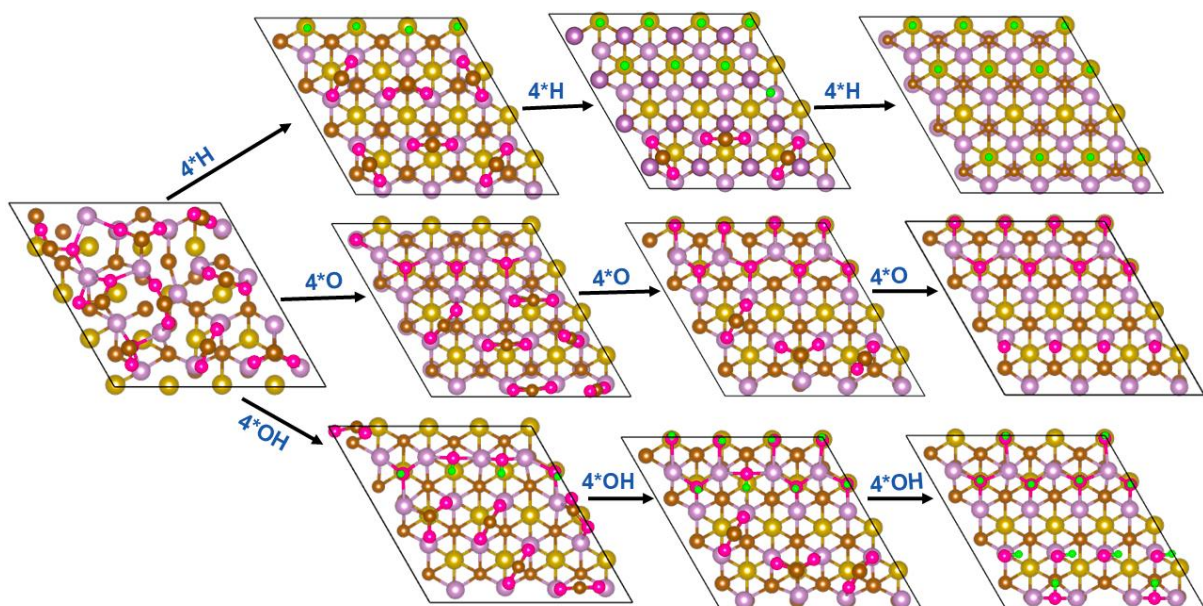

**Fig. S4:** Behaviour of  $\text{CO}_2$  adsorption on the catalyst surface with other co-adsorbates ( $\text{*H}$ ,  $\text{*O}$ ,  $\text{*OH}$ ).



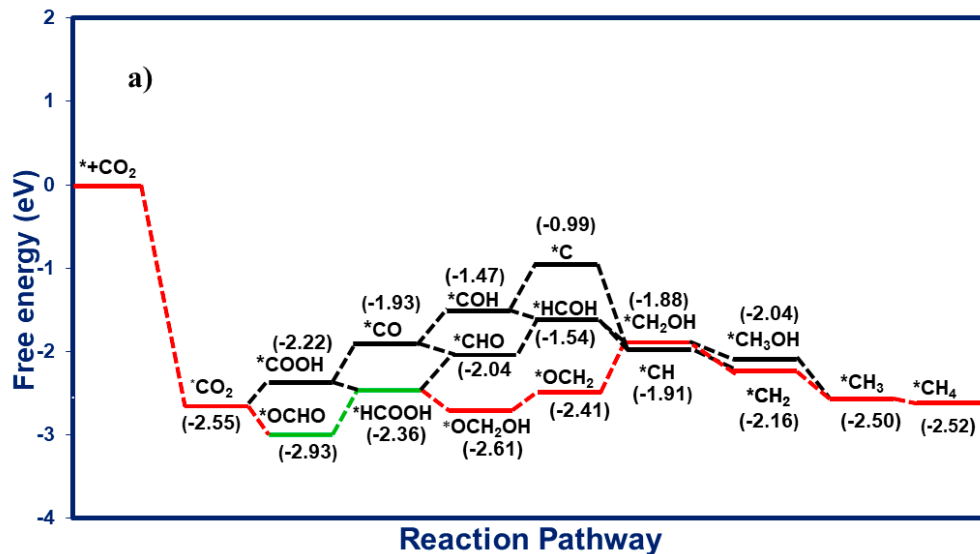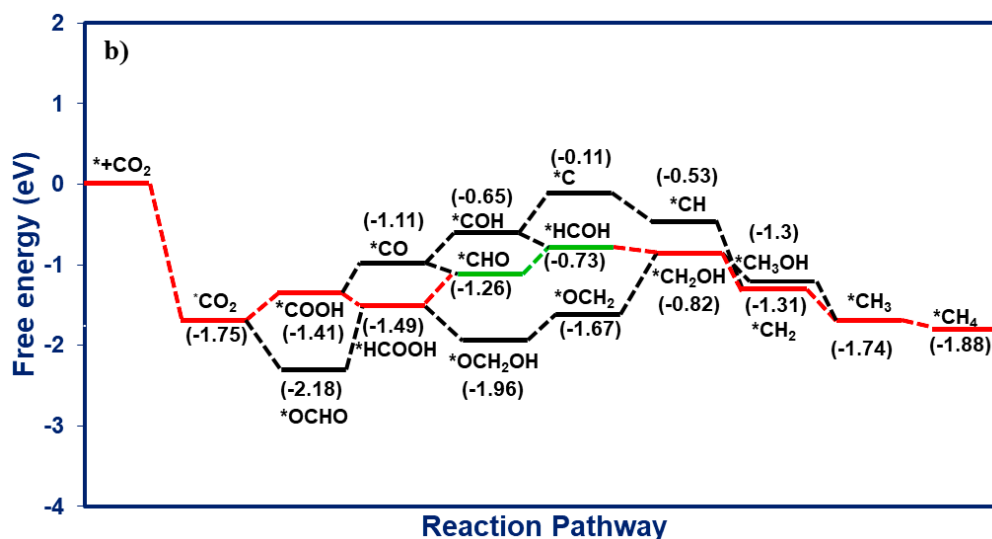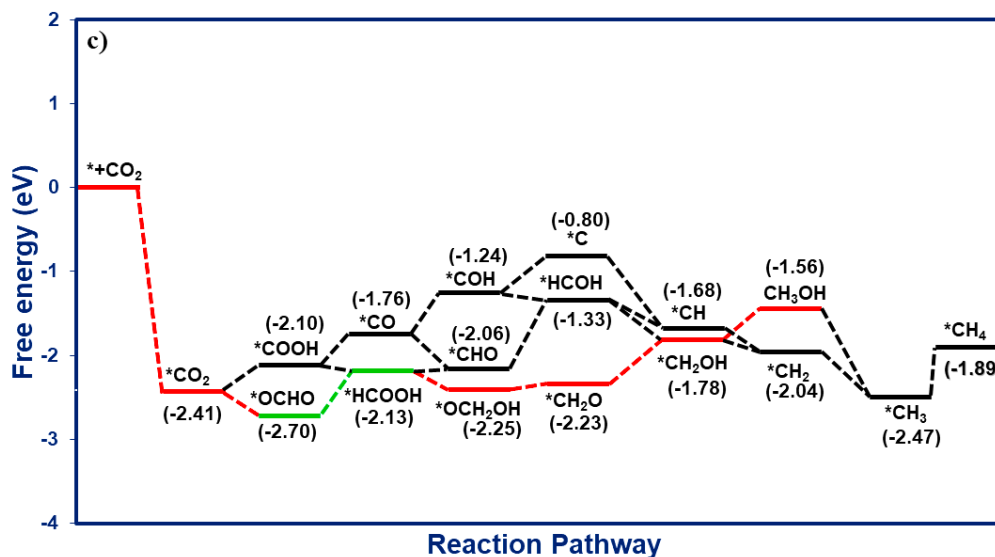

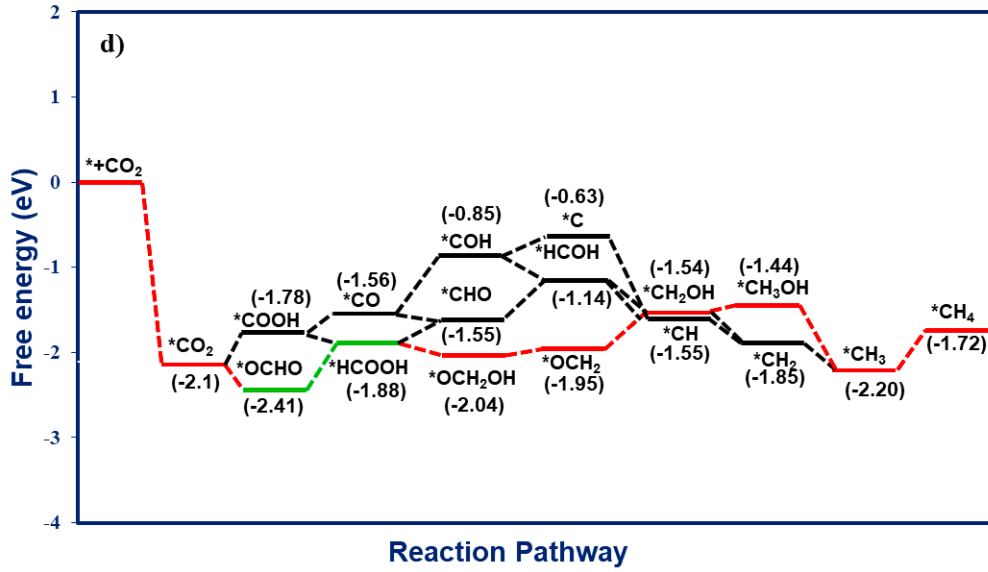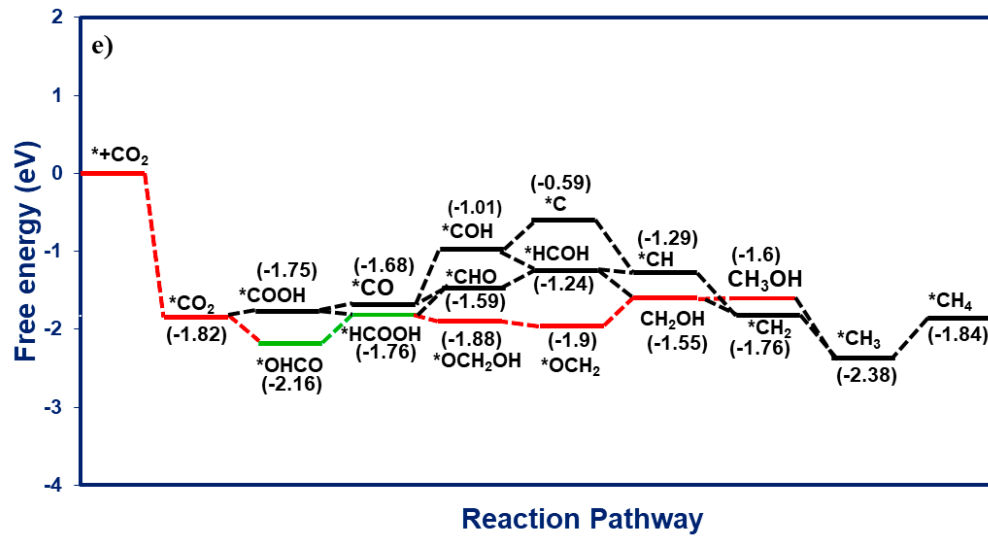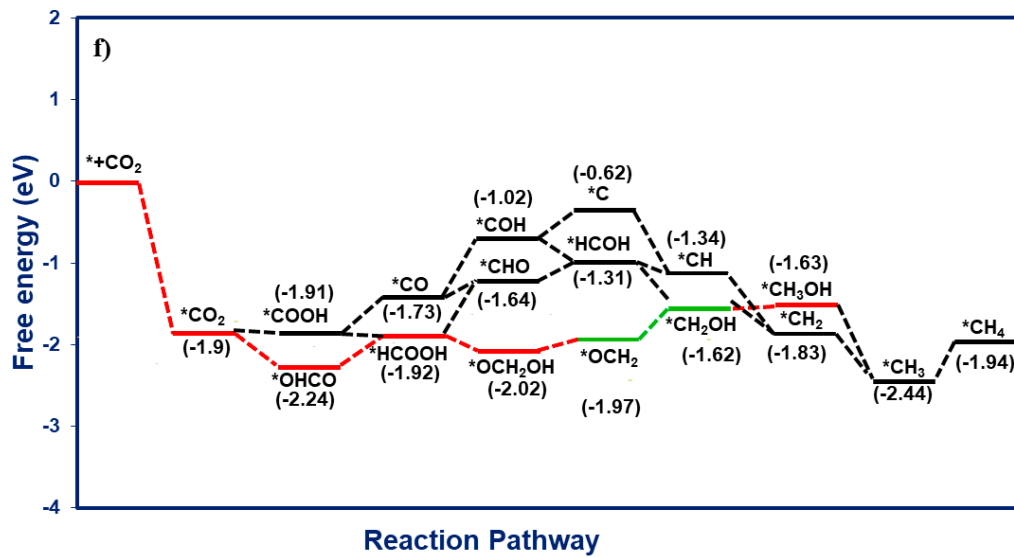

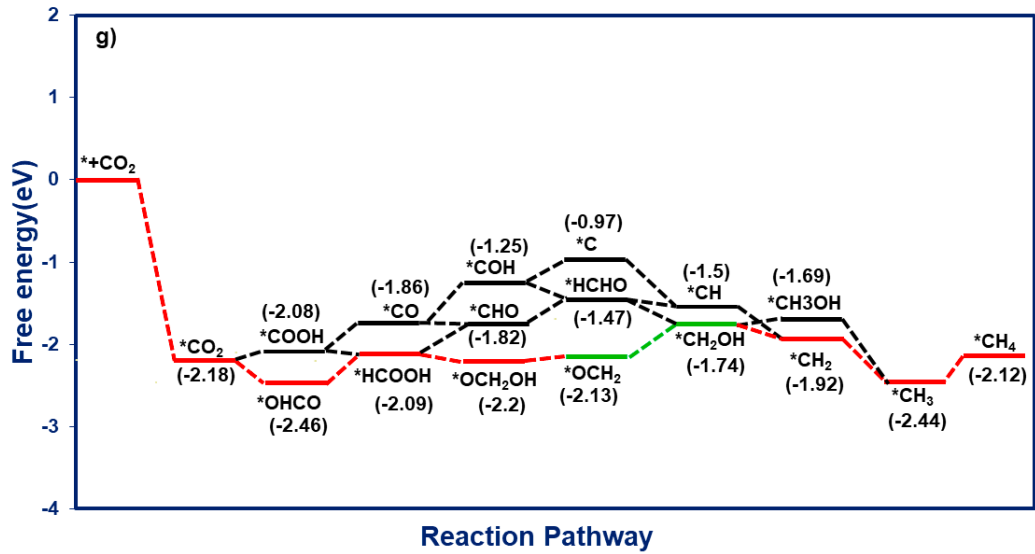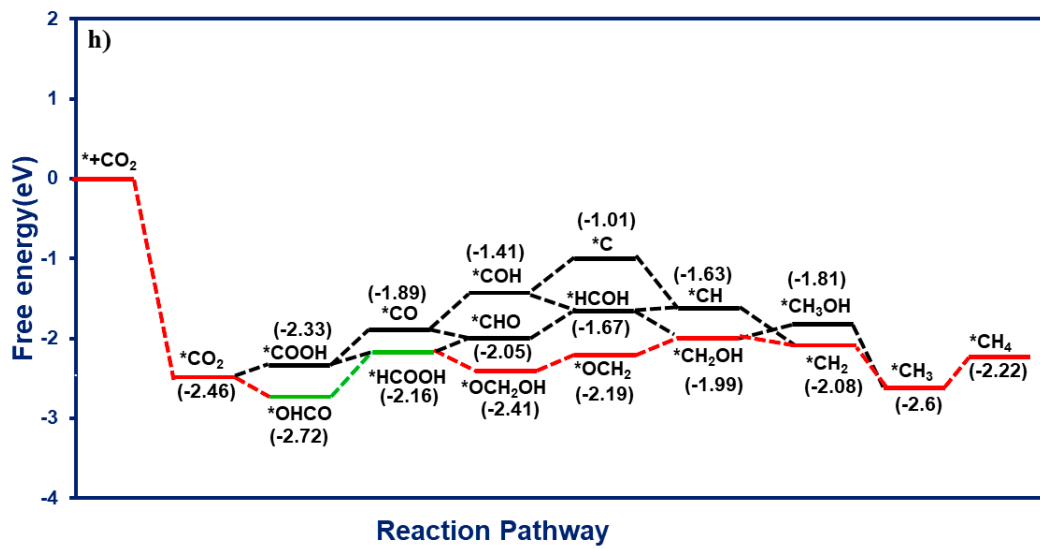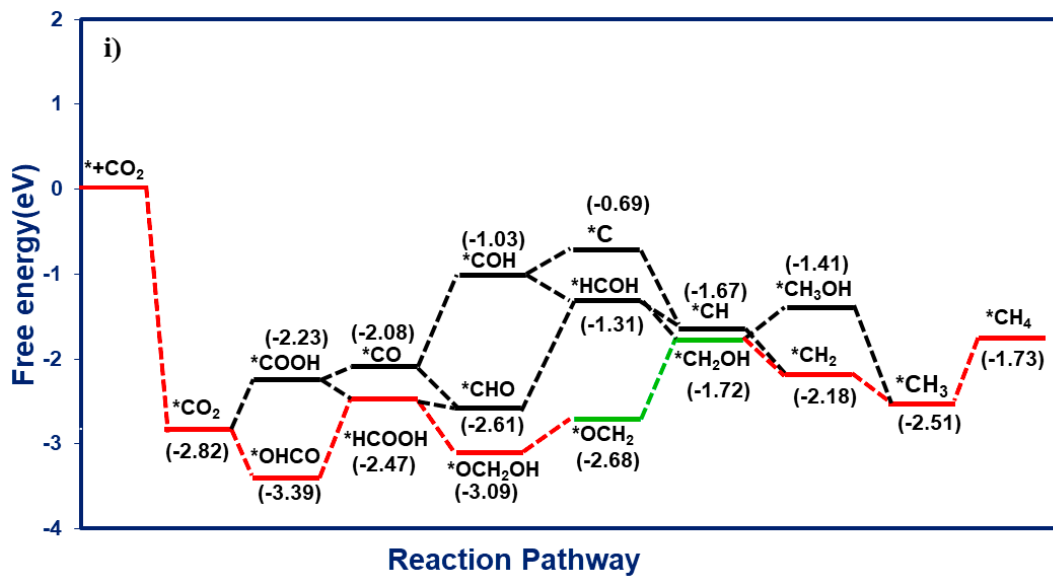

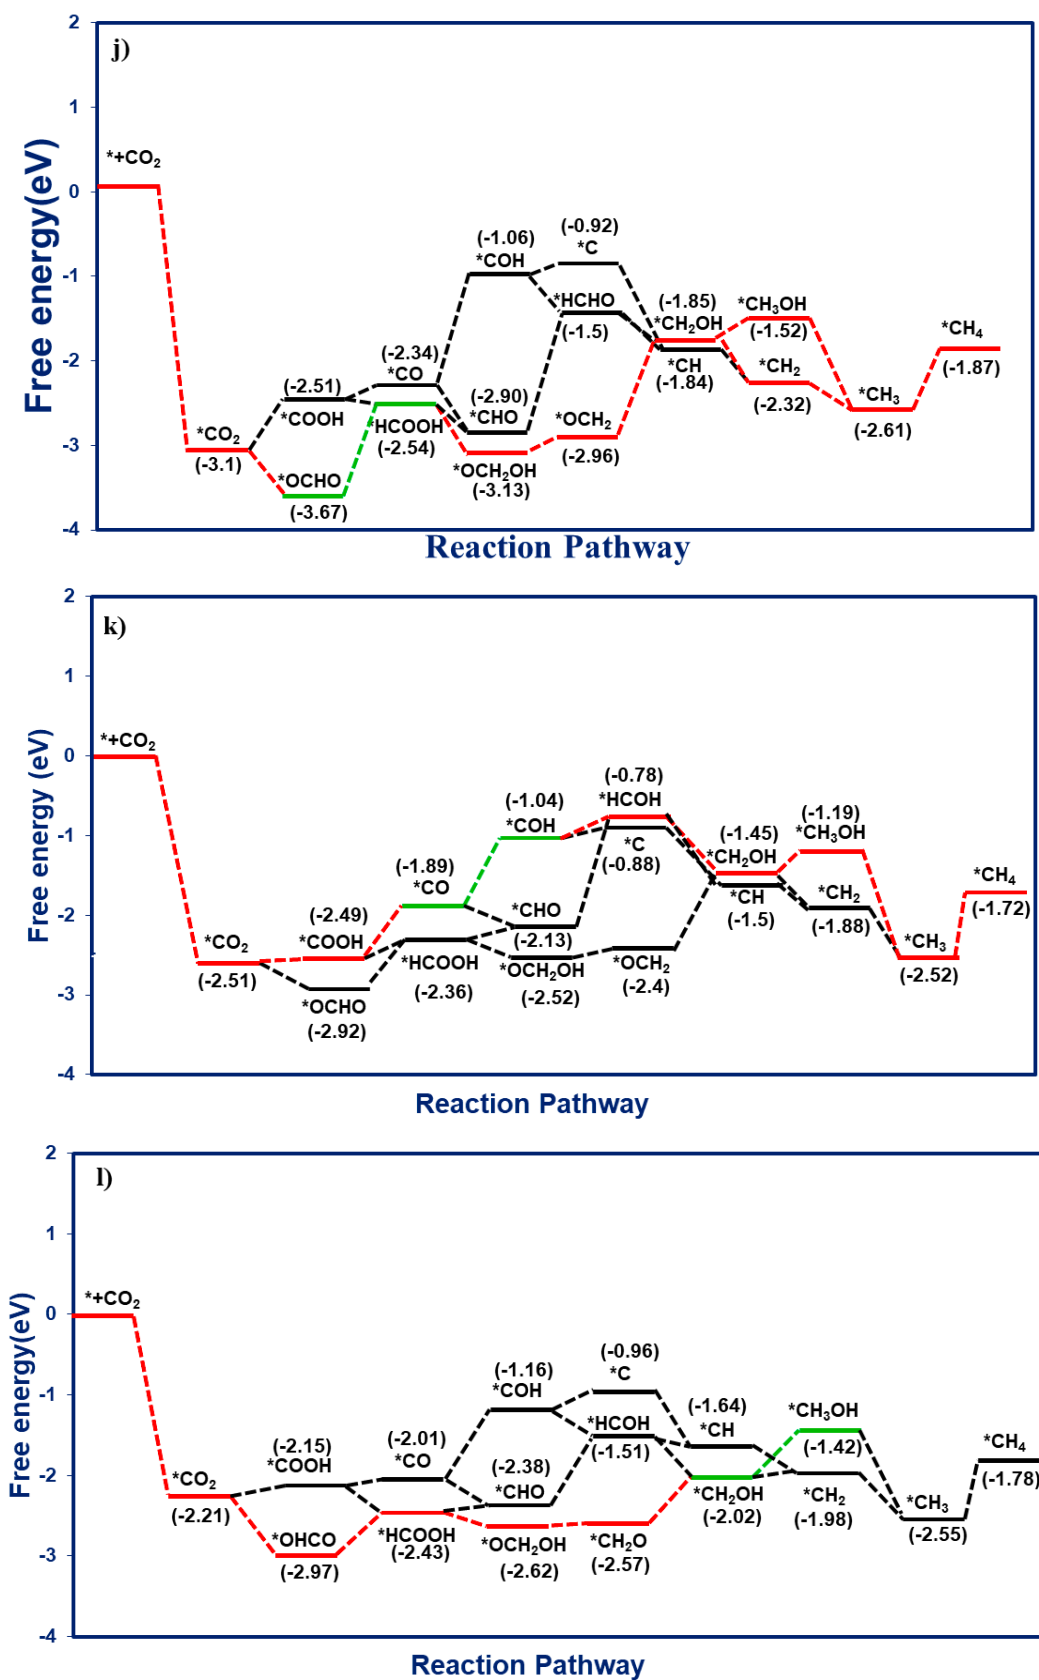

**Fig. S5:** Detailed computed free energy diagram representing the various possible pathways for the reduction of  $\text{CO}_2$  to  $\text{C}_1$  products on a)  $\text{Cr}_2\text{NbC}_2$  b)  $\text{Cr}_2\text{TaC}_2$  c)  $\text{Cr}_2\text{TiC}_2$  d)  $\text{Cr}_2\text{VC}_2$  e)  $\text{Mo}_2\text{NbC}_2$  f)  $\text{Mo}_2\text{TaC}_2$  g)  $\text{Mo}_2\text{TiC}_2$  h)  $\text{Mo}_2\text{VC}_2$  i)  $\text{Ti}_2\text{NbC}_2$  j)  $\text{Ti}_2\text{TaC}_2$  k)  $\text{V}_2\text{TaC}_2$  l)  $\text{V}_2\text{TiC}_2$ . The

*most favourable pathways are highlighted in red colour with the potential determining steps represented by green colour.*

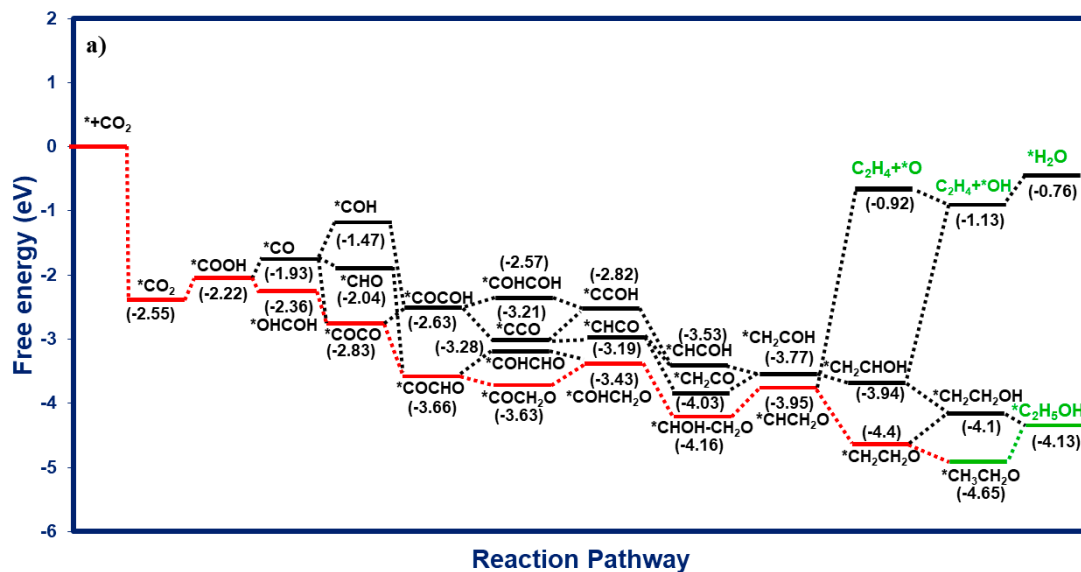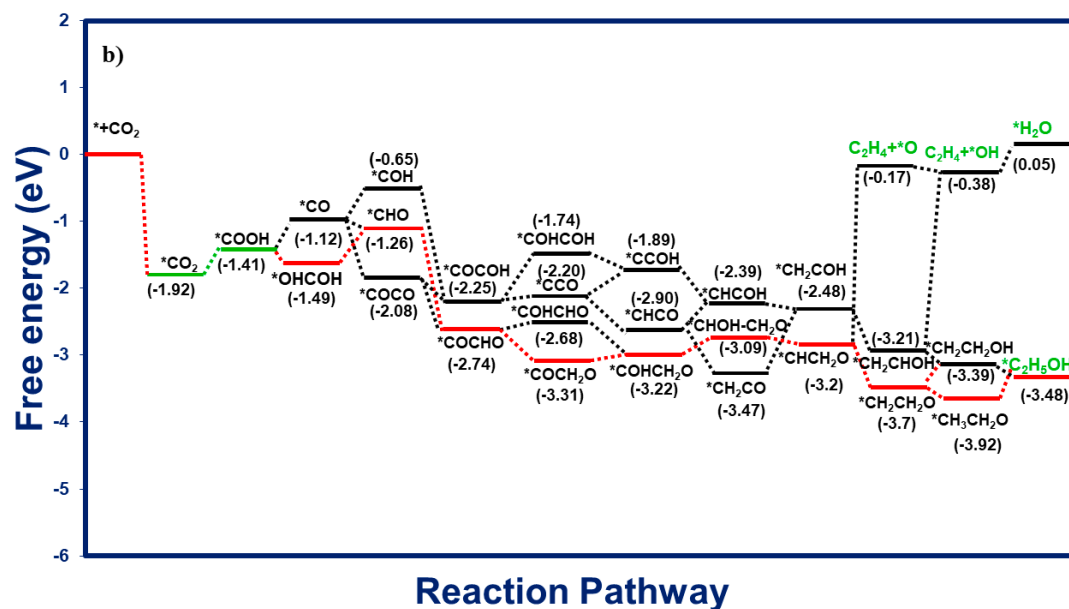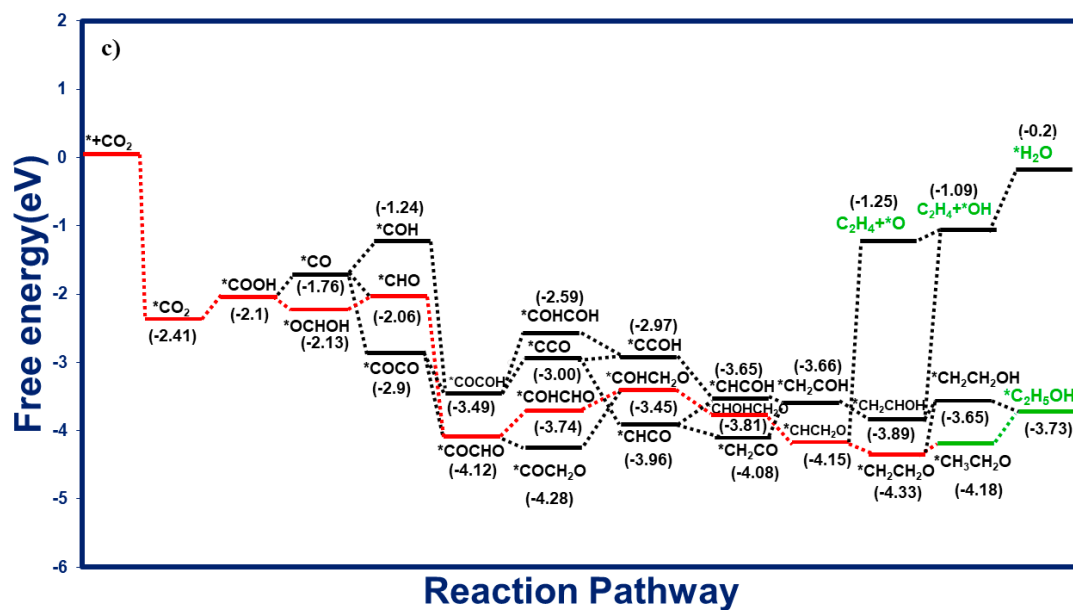

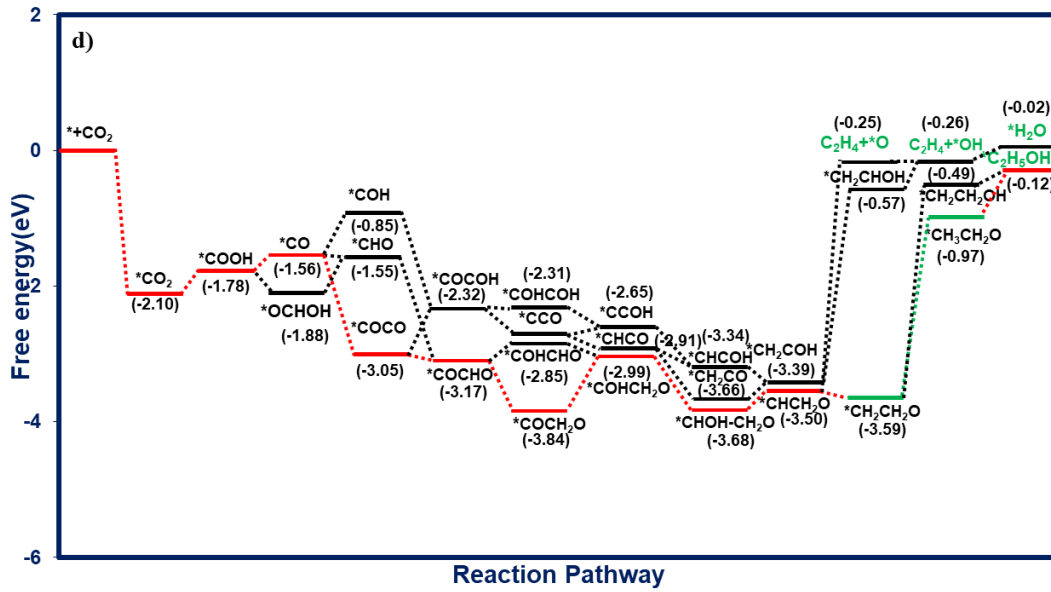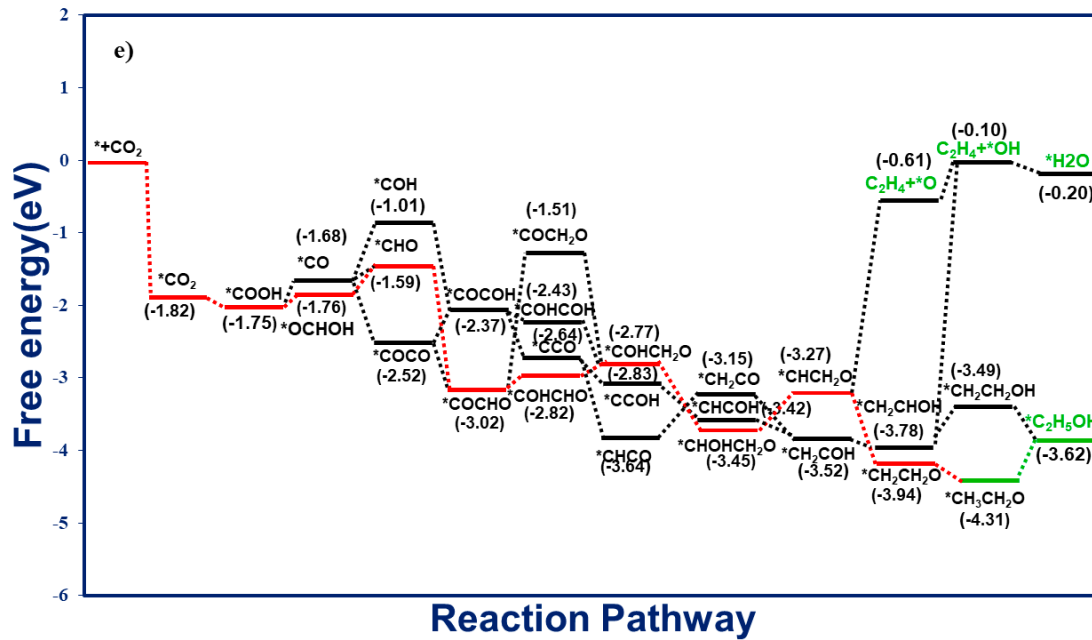

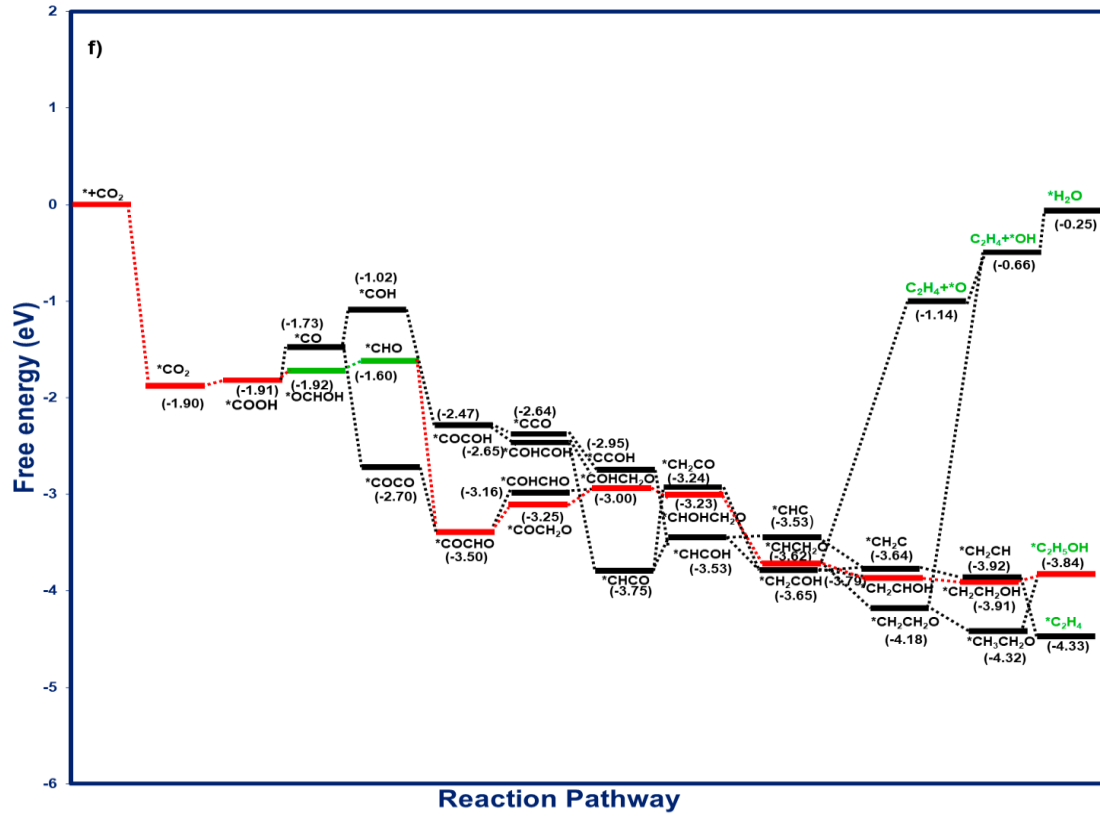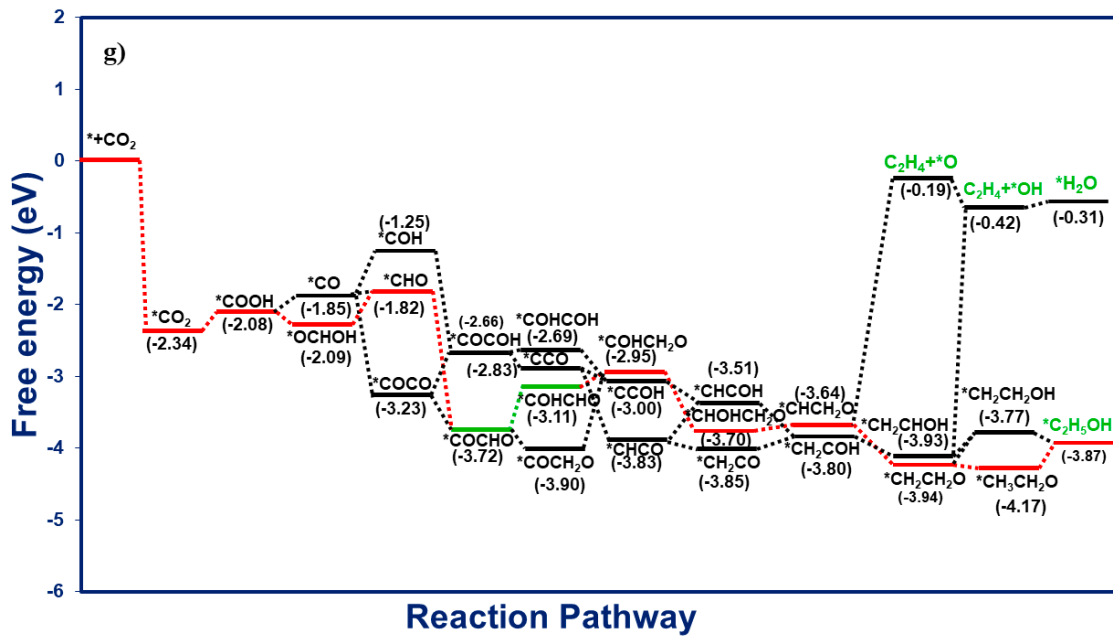



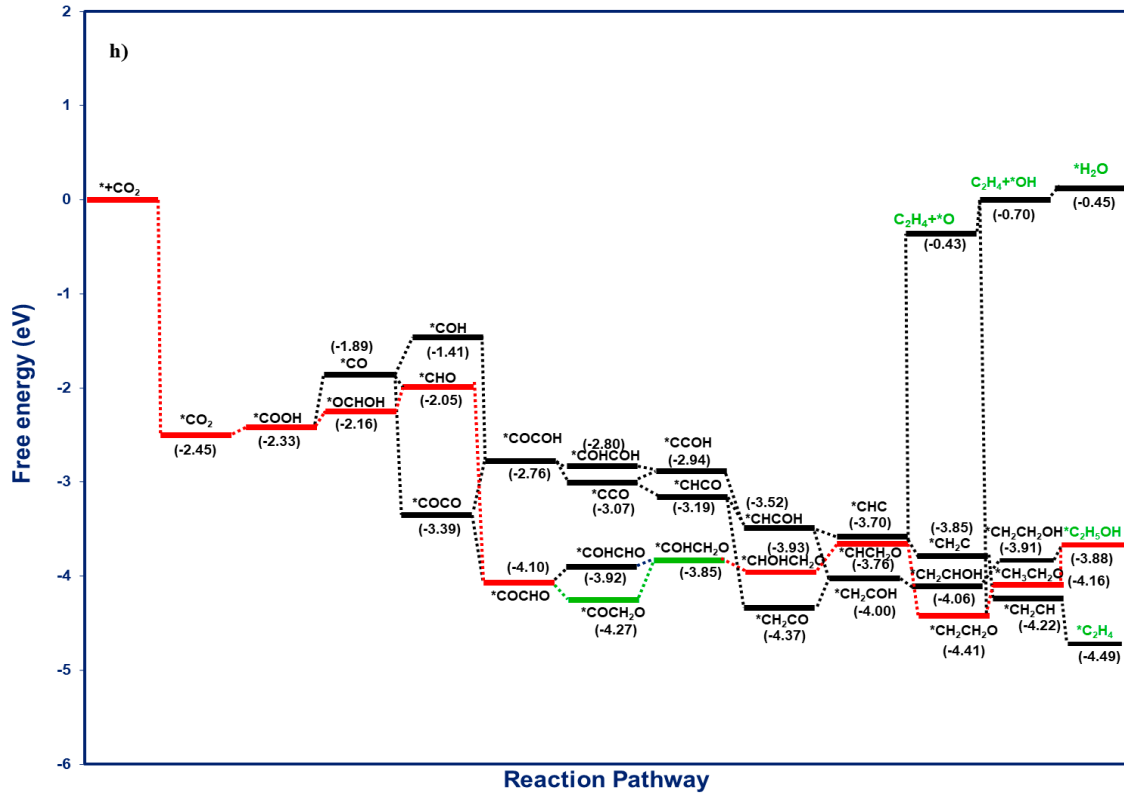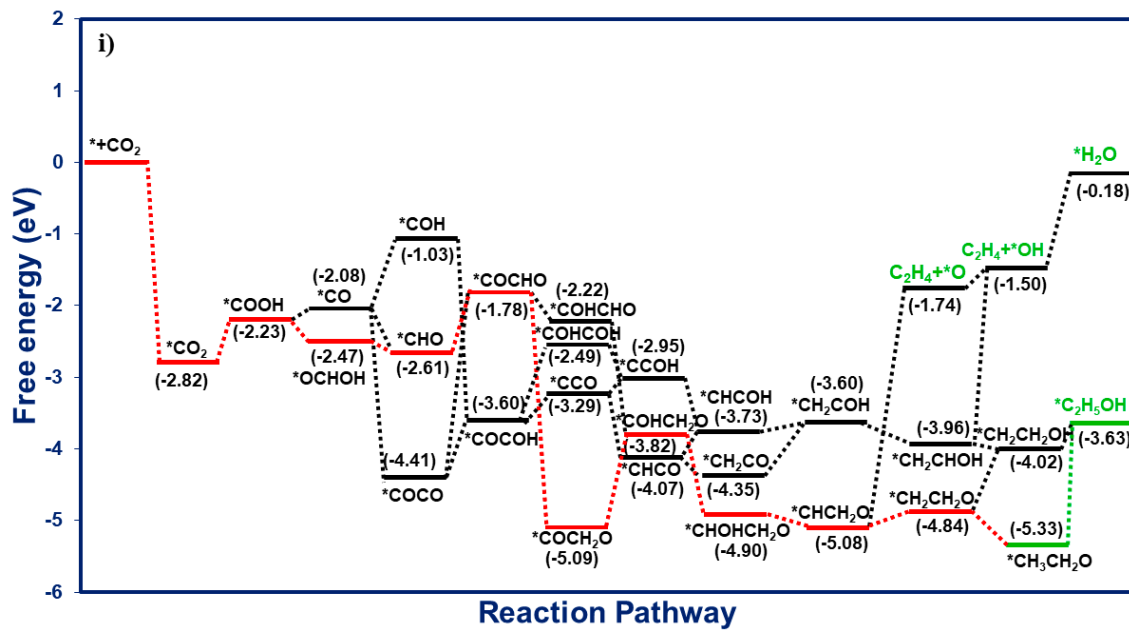

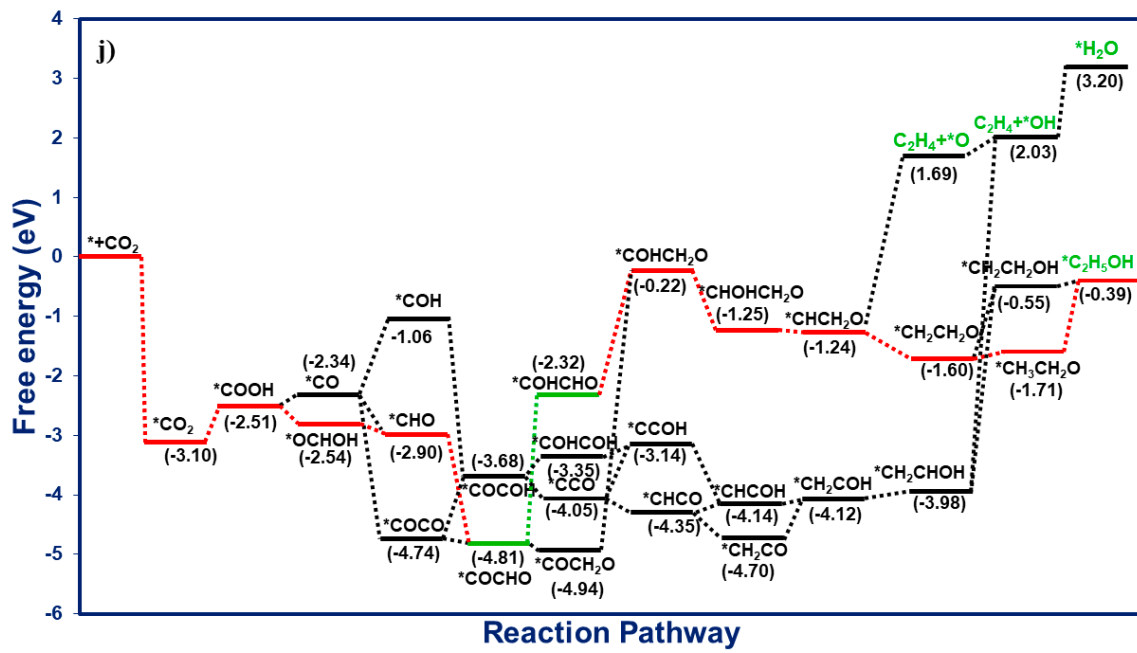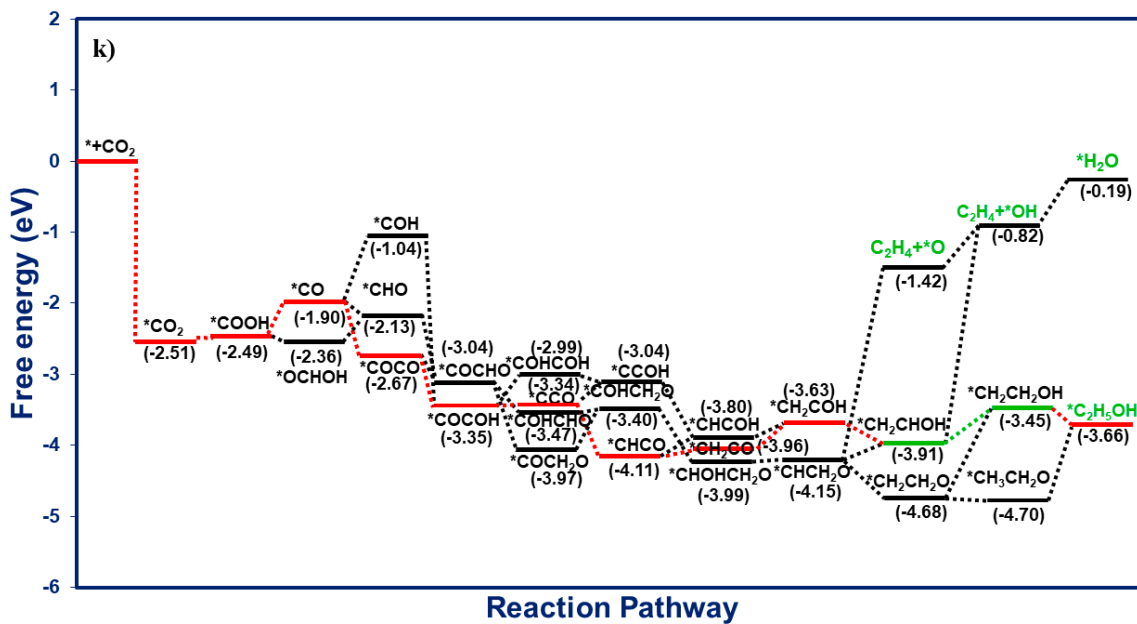

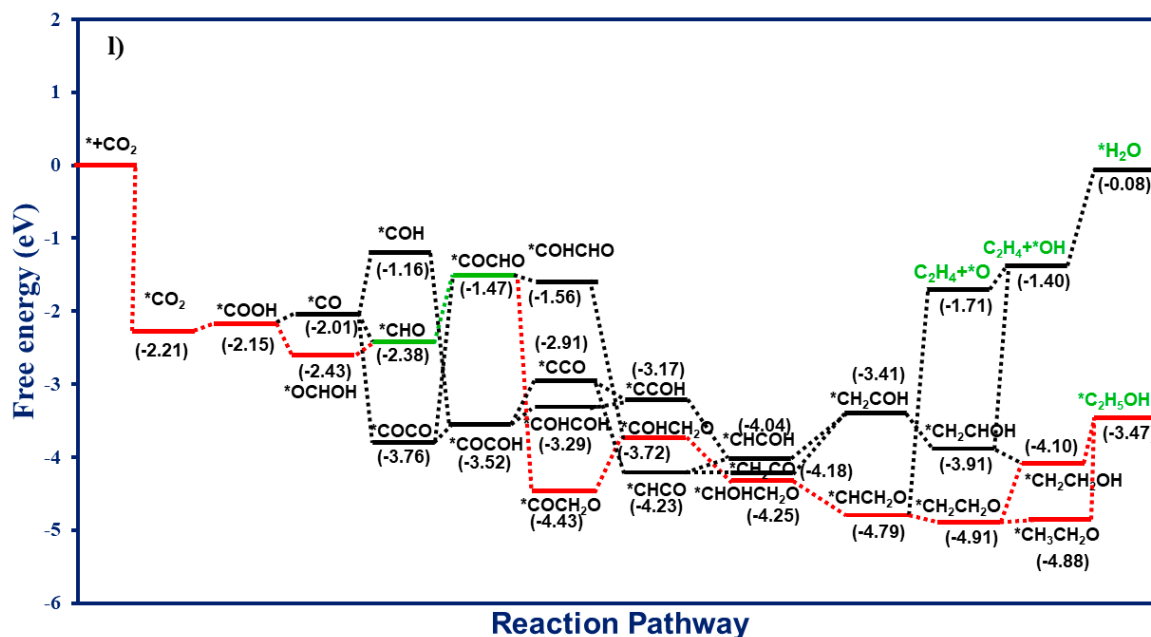

**Fig. S6:** Detailed computed free energy diagram representing the various possible pathways for the reduction of CO<sub>2</sub> to C<sub>2</sub> products on a) Cr<sub>2</sub>NbC<sub>2</sub> b) Cr<sub>2</sub>TaC<sub>2</sub> c) Cr<sub>2</sub>TiC<sub>2</sub> d) Cr<sub>2</sub>VC<sub>2</sub> e) Mo<sub>2</sub>NbC<sub>2</sub> f) Mo<sub>2</sub>TaC<sub>2</sub> g) Mo<sub>2</sub>TiC<sub>2</sub> h) Mo<sub>2</sub>VC<sub>2</sub> i) Ti<sub>2</sub>NbC<sub>2</sub> j) Ti<sub>2</sub>TaC<sub>2</sub> k) V<sub>2</sub>TaC<sub>2</sub> l) V<sub>2</sub>TiC<sub>2</sub>. The most favourable pathways are highlighted in red colour with the potential determining steps represented by green colour.

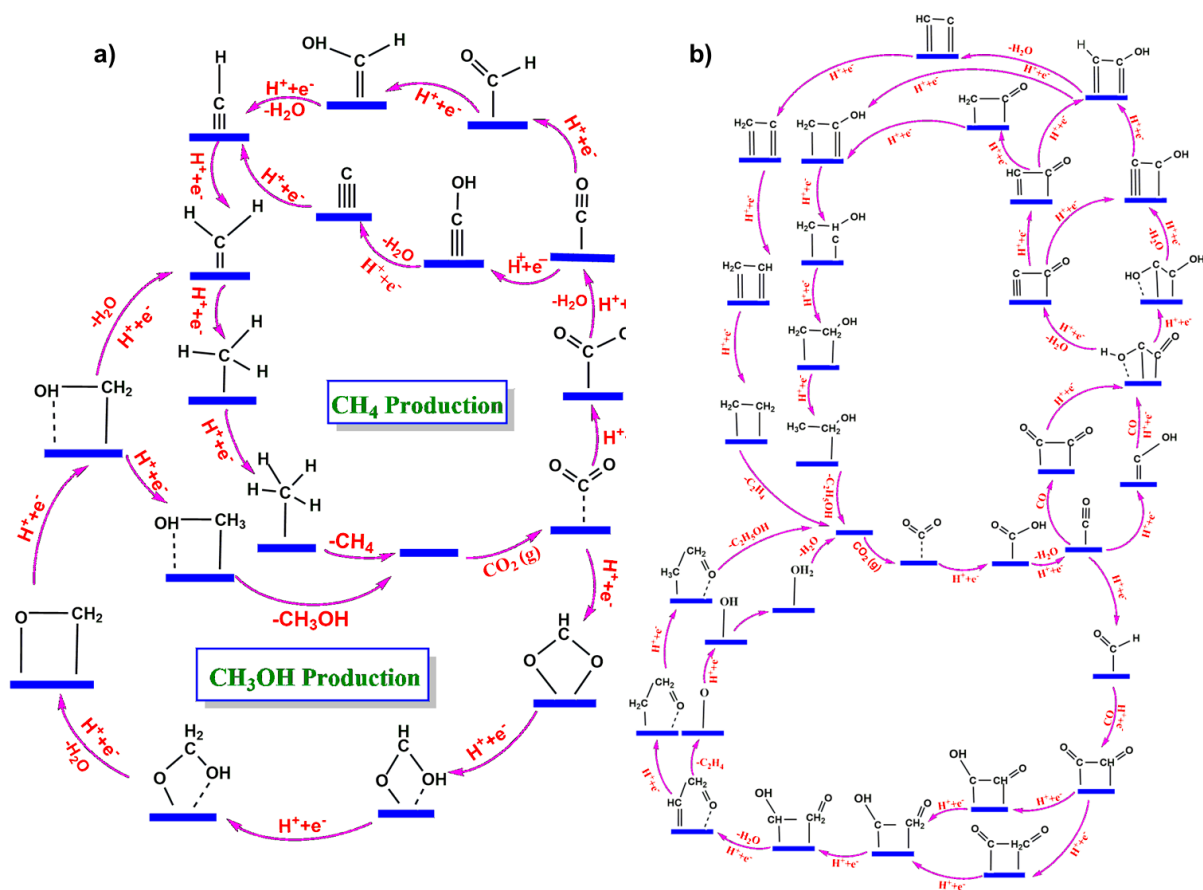

**Fig. S7:** Proposed reaction mechanism for CO<sub>2</sub> reduction to a) C<sub>1</sub> products (CH<sub>4</sub> and CH<sub>3</sub>OH) and b) C<sub>2</sub> products (C<sub>2</sub>H<sub>4</sub> and C<sub>2</sub>H<sub>5</sub>OH) on MXenes.

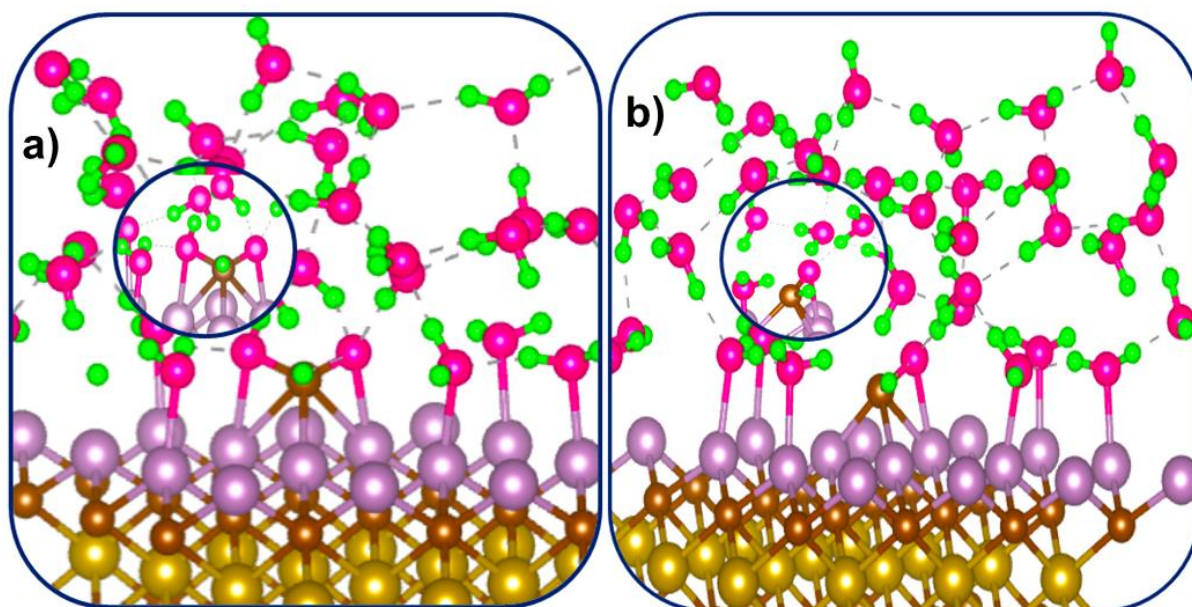

**Fig S8:** Electrode/Solution Interface of potential determining steps of CO<sub>2</sub> reduction on Mo<sub>2</sub>TaC<sub>2</sub> MXene: a) Initial state and b) Final state of C<sub>2</sub> products.

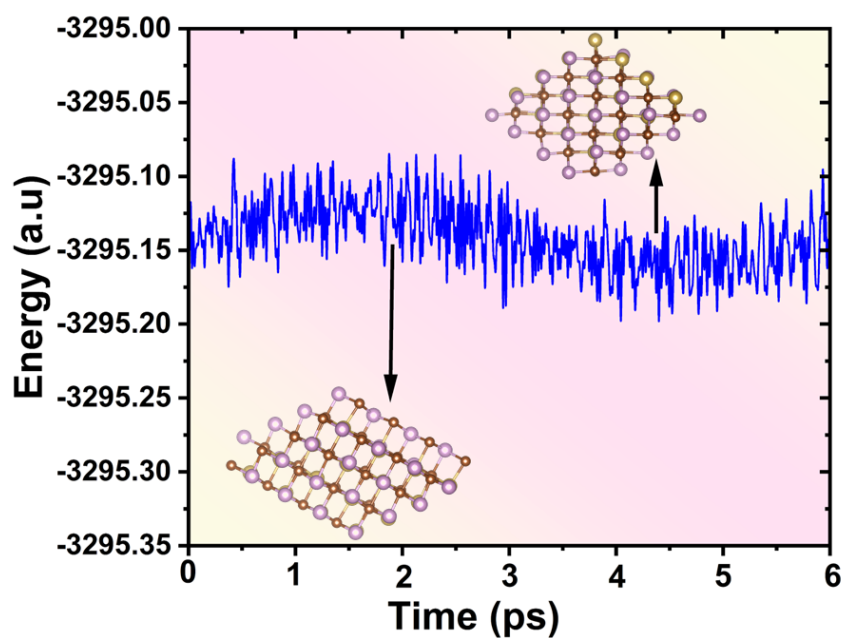

**Fig. S9:** Variation of energy versus the AIMD simulation time for Mo<sub>2</sub>TaC<sub>2</sub> for 6 ps at 600 K. The insets are the top views of snapshots of configurations.
